# Supplementary material for: Efficacy of Treatment for Metastatic Hormone-Sensitive Prostate Cancer: An Umbrella Review of Systematic Reviews and Meta-Analyses
Source: MDPI journal article supplement (doi:10.3390/cancers15245714), 2023-12-06
Supplement: s1 [file s1]

## Supplementary Materials

Supplement Table 1. Search term and strategies

Supplement Table 2. Excess significant test reported OS outcome in meta-analysis

Supplement Table 3. Citation matrix of all included systematic reviews and meta-analysis and Overlapping test for all reported outcomes

Supplement Table 4. Citation matrix of all included systematic reviews and meta-analysis and Overlapping test for OS outcome

### Supplement Table 1. Search term and strategies

#### PUBMED

| P  | Search term                                                                                                               | Number           |
|----|---------------------------------------------------------------------------------------------------------------------------|------------------|
| #1 | “Prostatic Neoplasms” [MeSH Terms]                                                                                        | 128,139          |
| #2 | (advance*) OR ("Neoplasm Metastasis"[MeSH Terms])                                                                         | <u>1,276,026</u> |
| #3 | ((("hormone dependent") OR "hormone naive") OR "hormone sensitive") OR (("castration sensitive") OR ("castration naive")) | 16,072           |
| #4 | #1 AND #2 AND #3                                                                                                          | 975              |

| I   | Search term                                                                                                                                                                                                             | Number |
|-----|-------------------------------------------------------------------------------------------------------------------------------------------------------------------------------------------------------------------------|--------|
| #5  | orchiectomy                                                                                                                                                                                                             | 18,279 |
| #6  | ((("Gonadotropin-Releasing Hormone antagonist*") OR ("GnRH antagonist*")) OR ("LHRH antagonist*")) OR (((("GnRH agonist*") OR ("LHRH agonist*")) OR ("Gonadotropin-Releasing Hormone agonist*")) OR ((LHRH) OR (GnRH))) | 45,073 |
| #7  | Buserelin                                                                                                                                                                                                               | 2462   |
| #8  | Goserelin                                                                                                                                                                                                               | 1899   |
| #9  | Leuprolide                                                                                                                                                                                                              | 3427   |
| #10 | Triptorelin                                                                                                                                                                                                             | 2156   |
| #11 | (firmagon) OR (Degarelix)                                                                                                                                                                                               | 244    |
| #12 | abarelix                                                                                                                                                                                                                | 62     |
| #13 | relugolix                                                                                                                                                                                                               | 17     |
| #14 | Docetaxel                                                                                                                                                                                                               | 16,670 |

|     |                                                                                             |        |
|-----|---------------------------------------------------------------------------------------------|--------|
| #15 | Enzalutamide                                                                                | 1,944  |
| #16 | Abiraterone                                                                                 | 2,263  |
| #17 | (Abiraterone) OR (Abiraterone Acetate[MeSH Terms])                                          | 2,263  |
| #18 | Apalutamide                                                                                 | 181    |
| #19 | #5 OR #6 OR #7 OR #8 OR #9 OR #10 OR #11 OR #12 OR #13<br>OR#14 OR #15 OR #16 OR #17 OR #18 | 80,846 |

| O   | Search term                                                          | Number    |
|-----|----------------------------------------------------------------------|-----------|
| #20 | survival[MeSH Terms]                                                 | 4,725     |
| #21 | Mortality[MeSH Terms]                                                | 382,516   |
| #22 | "Progression-Free Survival"                                          | 45,865    |
| #23 | testosterone                                                         | 102,547   |
| #24 | Quality of Life                                                      | 333,280   |
| #25 | ("patients reported outcome") OR ("patient-reported outcomes")       | 13306     |
| #26 | (toxicity) OR (toxicit*)                                             | 897,547   |
| #27 | "adverse event*"                                                     | 160,807   |
| #28 | Drug-Related Side Effects and Adverse Reactions[MeSH Terms]          | 115,950   |
| #29 | #20 OR #21 OR #22 OR #23 OR #24 OR #25 OR #26 OR #27 OR<br>#28 OR#29 | 1,987,912 |

|     |               |         |
|-----|---------------|---------|
| #30 | meta-analysis | 190,361 |
|-----|---------------|---------|

|                            |       |
|----------------------------|-------|
| Combine P I O S            |       |
| #4 AND #19 AND #29 AND #30 | 1,304 |

## SCOPUS

| P  | Search term                                                           | Number     |
|----|-----------------------------------------------------------------------|------------|
| #1 | ( "Prostate cancer" ) OR ( "Prostatic cancer" )                       | 642,253    |
| #2 | ( metastasis OR metastatic ) OR ( advanced OR advance ) OR ( stage4 ) | 14,572,580 |

|    |                        |         |
|----|------------------------|---------|
| #3 | "castration resistant" | 37,759  |
| #4 | #1 AND #2 NOT #3       | 408,404 |

| I   | Search term                                                                                                                                                                                       |         |
|-----|---------------------------------------------------------------------------------------------------------------------------------------------------------------------------------------------------|---------|
| #5  | ( orchiectomy OR orchidectomy )                                                                                                                                                                   | 24,563  |
| #6  | ( buserelin OR goserelin OR leuprolide OR triptorelin OR "Luteinizing hormone-releasing hormone" OR lhrh OR "Gonadotropin-Releasing Hormone" OR gnrh )                                            | 55,357  |
| #7  | ( firmagon OR degarelix OR abarelix OR relugolix OR "Luteinizing hormone-releasing hormone antagonist" OR "lhrh antagonist" OR "Gonadotropin-Releasing Hormone antagonist" OR "gnrh antagonist" ) | 4,612   |
| #8  | ( docetaxel )                                                                                                                                                                                     | 49,112  |
| #9  | ( enzalutamide )                                                                                                                                                                                  | 3,768   |
| #10 | ( abiraterone )                                                                                                                                                                                   | 4,550   |
| #11 | ( apalutamide )                                                                                                                                                                                   | 382     |
| #12 | #5 OR #6 OR #7 OR #8 OR #9 OR #10 OR #11                                                                                                                                                          | 128,769 |

| O   | Search term                        | Number    |
|-----|------------------------------------|-----------|
| #13 | ( survival )                       | 1,693,733 |
| #14 | ( "Progression-Free Survival" )    | 74,635    |
| #15 | ( testosterone )                   | 146,211   |
| #16 | ( "quality of life" )              | 510,400   |
| #17 | ( toxicities OR "adverse events" ) | 969,522   |
| #18 | #13 OR #14 OR #15 OR #16 OR #17    | 3,083,500 |

| S   | Search term                          | Number    |
|-----|--------------------------------------|-----------|
| #19 | "systematic review" OR meta-analysis | 4,039,383 |

|                            |       |
|----------------------------|-------|
| Combine P I O S            |       |
| #4 AND #12 AND #18 AND #19 | 2,831 |



**Supplement Table 2. Excess significant test reported OS outcome in meta-analysis**

| MA id/<br>Author | (year) | Comparison                | Outcome | Total<br>Number of<br>Primary<br>studies<br>(publication) | Number<br>of<br>primary<br>trials | Pooled effects<br>(95% CI) | Excess significance |                |
|------------------|--------|---------------------------|---------|-----------------------------------------------------------|-----------------------------------|----------------------------|---------------------|----------------|
|                  |        |                           |         |                                                           |                                   |                            | O/E                 | <i>p-value</i> |
| 1                | 2021   | Mixed ADT vs Docetaxel    | OS      | 7                                                         | 3                                 | 0.80( 0.71, 0.89)          | 2/1.4               | 0.488          |
| 2                | 2021   | Mixed ADT vs Docetaxel    | OS      | 18                                                        | 3                                 | 0.79(0.71,0.89)            | 2/1.792             | 0.807          |
|                  |        | Mixed ADT vs Abiraterone  |         |                                                           | 2                                 | 0.61(0.54, 0.70)           | 2/1.997             | 0.950          |
|                  |        | Mixed ADT vs Apalutamide  |         |                                                           | 1                                 | 0.67(0.51, 0.89)           | 1/0.094             | 0.794          |
|                  |        | Mixed ADT vs Enzalutamide |         |                                                           | 2                                 | 0.81(0.53,1.24)            | 1/1.028             | 0.968          |
| 4                | 2020   | Mixed ADT vs Docetaxel    | OS      | 10                                                        | 3                                 | 0.81 (0.72, 0.92)          | 2/1.792             | 0.806          |
|                  |        | Mixed ADT vs Abiraterone  |         |                                                           | 2                                 | 0.69 (0.61, 0.79)          | 2/1.997             | 0.950          |
|                  |        | Mixed ADT vs Apalutamide  |         |                                                           | 1                                 | 0.64 (0.47, 0.86)          | 1/0.936             | 0.794          |
|                  |        | Mixed ADT vs Enzalutamide |         |                                                           | 1                                 | 0.53 (0.37, 0.75)          | 1/1.028             | 0.968          |
| 5                | 2020   | Mixed ADT vs Docetaxel    | OS      | 11                                                        | 3                                 | 0.74 (0.61, 0.90)          | 2/1.792             | 0.806          |
|                  |        | Mixed ADT vs Abiraterone  |         |                                                           | 3                                 | 0.62 (0.53, 0.71)          | 3/2.994             | 0.938          |
|                  |        | Mixed ADT vs Apalutamide  |         |                                                           | 1                                 | 0.63 (0.47, 0.84)          | 1/0.936             | 0.794          |
|                  |        | Mixed ADT vs Enzalutamide |         |                                                           | 2                                 | 0.65 (0.43 ,0.98)          | 1/1.028             | 0.968          |

|    |      |                          |    |    |   |                   |         |       |
|----|------|--------------------------|----|----|---|-------------------|---------|-------|
|    |      | Docetaxel vs Abiraterone |    |    | 1 | 1.13 (0.77, 1.66) | 0/0.091 | 0.752 |
| 7  | 2020 | Mixed ADT vs Docetaxel   | OS | 11 | 3 | 0.74 (0.66, 0.82) | 2/1.792 | 0.806 |
|    |      | Mixed ADT vs Abiraterone |    |    | 2 | 0.62 (0.53, 0.71) | 2/1.994 | 0.938 |
| 8  | 2020 | Mixed ADT vs Abiraterone | OS | 10 | 2 | 0.64 (0.56, 0.73) | 2/1.999 | 0.975 |
| 9  | 2019 | Mixed ADT vs Docetaxel   | OS | 9  | 2 | 0.86 (0.69, 1.07) | 2/1.710 | 0.560 |
|    |      | Mixed ADT vs Abiraterone |    |    | 2 | 0.85 (0.67, 1.08) | 2/1.994 | 0.938 |
| 10 | 2018 | Mixed ADT vs Docetaxel   | OS | 6  | 3 | 0.77 (0.68, 0.88) | 2/1.792 | 0.806 |
|    |      | Mixed ADT vs Abiraterone |    |    | 2 | 0.62 (0.53, 0.71) | 2/1.994 | 0.938 |
| 12 | 2018 | Mixed ADT vs Docetaxel   | OS | 5  | 3 | 0.75 (0.63, 0.91) | 2/1.792 | 0.806 |
|    |      | Mixed ADT vs Abiraterone |    |    | 2 | 0.63 (0.55, 0.72) | 2/1.994 | 0.938 |
| 13 | 2018 | Mixed ADT vs Docetaxel   | OS | 7  | 3 | 0.75 (0.65, 0.86) | 2/1.792 | 0.806 |
|    |      | Mixed ADT vs Abiraterone |    |    | 2 | 0.63 (0.55, 0.72) | 2/1.994 | 0.938 |
| 14 | 2018 | Mixed ADT vs Docetaxel   | OS | 11 | 3 | 0.74 (0.63, 0.86) | 2/1.792 | 0.806 |
|    |      | Mixed ADT vs Abiraterone |    |    | 2 | 0.60 (0.50, 0.71) | 2/1.994 | 0.938 |
| 16 | 2017 | Mixed ADT vs Abiraterone | OS | 2  | 2 | 0.62 (0.53, 0.71) | 2/1.994 | 0.938 |
| 17 | 2016 | Mixed ADT vs Docetaxel   | OS | 6  | 3 | 0.75 (0.61, 0.91) | 2/1.739 | 0.760 |
| 18 | 2016 | Mixed ADT vs Docetaxel   | OS | 5  | 2 | 0.73 (0.64, 0.84) | 1/1.086 | 0.903 |
| 21 | 2016 | Mixed ADT vs Docetaxel   | OS | 2  | 2 | 0.73 (0.59, 0.90) | 2/1.739 | 0.584 |
| 22 | 2016 | Mixed ADT vs Docetaxel   | OS | 3  | 3 | 0.77 (0.68, 0.87) | 2/2.016 | 0.984 |





[illegible]

|                      |      |  |  |  |  |  |  |  |   |  |   |  |   |  |  |  |  |   |  |   |   |  |   |   |   |   |  |  |
|----------------------|------|--|--|--|--|--|--|--|---|--|---|--|---|--|--|--|--|---|--|---|---|--|---|---|---|---|--|--|
| Fizazi, K.           | 2018 |  |  |  |  |  |  |  | ⊙ |  |   |  |   |  |  |  |  |   |  |   |   |  |   |   |   |   |  |  |
| Fizazi, K.           | 2013 |  |  |  |  |  |  |  | ⊙ |  |   |  |   |  |  |  |  |   |  |   |   |  |   |   |   |   |  |  |
| Fizazi, K.           | 2017 |  |  |  |  |  |  |  | ⊙ |  |   |  |   |  |  |  |  |   |  |   |   |  |   |   |   |   |  |  |
| James, N.D.          | 2017 |  |  |  |  |  |  |  | ⊙ |  |   |  |   |  |  |  |  |   |  |   |   |  |   |   |   |   |  |  |
| Fizazi, K.           | 2018 |  |  |  |  |  |  |  | ⊙ |  |   |  |   |  |  |  |  |   |  |   |   |  |   |   |   |   |  |  |
| Sweeney, C.          | 2016 |  |  |  |  |  |  |  |   |  | ⊙ |  |   |  |  |  |  |   |  |   |   |  |   |   |   |   |  |  |
| Gravis, G.           | 2018 |  |  |  |  |  |  |  |   |  | ⊙ |  |   |  |  |  |  |   |  |   |   |  |   |   |   |   |  |  |
| Patrick-Miller, L.J. | 2016 |  |  |  |  |  |  |  |   |  | ⊙ |  |   |  |  |  |  |   |  |   |   |  |   |   |   |   |  |  |
| Sweeney, C.          | 2014 |  |  |  |  |  |  |  |   |  |   |  |   |  |  |  |  | ⊙ |  | ⊙ |   |  |   |   |   |   |  |  |
| Sydes, M. R.         | 2017 |  |  |  |  |  |  |  |   |  | ⊙ |  |   |  |  |  |  |   |  |   |   |  |   |   |   |   |  |  |
| Rajan, P.            | 2015 |  |  |  |  |  |  |  |   |  |   |  | ⊙ |  |  |  |  |   |  |   |   |  |   |   |   |   |  |  |
| Gravis, G.           | 2015 |  |  |  |  |  |  |  |   |  |   |  |   |  |  |  |  | ⊙ |  |   | ⊙ |  | ⊙ |   |   |   |  |  |
| James, N.D.          | 2015 |  |  |  |  |  |  |  |   |  |   |  |   |  |  |  |  | ⊙ |  |   | ⊙ |  |   |   |   |   |  |  |
| James, N.D.          | 2015 |  |  |  |  |  |  |  |   |  |   |  |   |  |  |  |  | ⊙ |  |   |   |  |   |   |   |   |  |  |
| Tombal, B.           | 2010 |  |  |  |  |  |  |  |   |  |   |  |   |  |  |  |  |   |  |   |   |  | ⊙ | ⊙ |   |   |  |  |
| Lee, D.              | 2015 |  |  |  |  |  |  |  |   |  |   |  |   |  |  |  |  |   |  |   |   |  | ⊙ |   |   |   |  |  |
| Smith, M. R.         | 2010 |  |  |  |  |  |  |  |   |  |   |  |   |  |  |  |  |   |  |   |   |  | ⊙ |   |   |   |  |  |
| Scher, H. I.         | 2012 |  |  |  |  |  |  |  |   |  |   |  |   |  |  |  |  |   |  |   |   |  |   |   | ⊙ | ⊙ |  |  |
| Beer, T. M.          | 2014 |  |  |  |  |  |  |  |   |  |   |  |   |  |  |  |  |   |  |   |   |  |   |   | ⊙ | ⊙ |  |  |

[illegible]

[illegible]

[illegible]

[illegible]

[illegible]

**Supplement Table 4. Citation matrix of all included systematic reviews and meta-analysis and Overlapping test for OS outcome**

[illegible]





|             |      |  |  |  |  |  |  |  |  |  |  |  |   |  |  |  |  |   |   |   |   |
|-------------|------|--|--|--|--|--|--|--|--|--|--|--|---|--|--|--|--|---|---|---|---|
| Sweeney, C. | 2014 |  |  |  |  |  |  |  |  |  |  |  |   |  |  |  |  | ⊙ | ⊙ |   |   |
| Rajan, P.   | 2015 |  |  |  |  |  |  |  |  |  |  |  | ⊙ |  |  |  |  |   |   |   |   |
| Gravis, G.  | 2015 |  |  |  |  |  |  |  |  |  |  |  |   |  |  |  |  | ⊙ |   | ⊙ | ⊙ |
| James, N.D. | 2015 |  |  |  |  |  |  |  |  |  |  |  |   |  |  |  |  | ⊙ |   | ⊙ |   |
| James, N.D. | 2015 |  |  |  |  |  |  |  |  |  |  |  |   |  |  |  |  | ⊙ |   |   |   |
| CA    21%   |      |  |  |  |  |  |  |  |  |  |  |  |   |  |  |  |  |   |   |   |   |
| CCA   16.4% |      |  |  |  |  |  |  |  |  |  |  |  |   |  |  |  |  |   |   |   |   |
